# Supplementary material for: Sex and Gender Differences in Testing, Hospital Admission, Clinical Presentation, and Drivers of Severe Outcomes From COVID-19
Source: Oxford University Press journal article supplement (doi:10.1093/ofid/ofab448), 2021-08-31
Supplement: ofab448_suppl_supplementary_materials.pdf [file ofab448_suppl_supplementary_materials.pdf]

**Supplemental Materials:**

- 1. Supplemental Tables 1-4**
- 2. Supplemental Figures 1-4**

**Supplemental Table 1. Signs on presentation.** Vital signs from the first 24 hours after hospital admission among all individuals and those who developed severe disease or progressed to death. For temperature, shown are number febrile (%), for all other values, median (standard deviation) over the first 24 hours are shown. Statistics for categorical variables are by Chi-square, and by t-test for continuous variables.

|                                          | Overall cohort    |                 |         | Severe/death cohort |                |         |
|------------------------------------------|-------------------|-----------------|---------|---------------------|----------------|---------|
|                                          | All ages          |                 |         | All ages            |                |         |
|                                          | Females<br>N=1280 | Males<br>N=1346 | P value | Females<br>N=360    | Males<br>N=483 | P value |
| Temp >38.1 °C                            | 383 (31%)         | 566 (42%)       | <0.001  | 141 (39%)           | 263 (55%)      | <0.001  |
| Pulse beats/<br>minute                   | 85 (15)           | 86 (15)         | >0.9    | 88 (17)             | 89 (17)        | 0.05    |
| Respiratory rate<br>breaths/minute       | 20.4 (4.3)        | 21.1 (5.0)      | <0.001  | 23.2 (5.9)          | 24.1 (6.2)     | 0.03    |
| FiO <sub>2</sub>                         | 0.30 (0.17)       | 0.33 (0.20)     | <0.001  | 0.45 (0.25)         | 0.49 (0.26)    | 0.03    |
| SpO <sub>2</sub> :FiO <sub>2</sub> ratio | 384 (119)         | 364 (130)       | <0.001  | 275 (129)           | 257 (132)      | 0.05    |

Abbreviations: Temp: temperature; FiO<sub>2</sub>: fraction of inspired oxygen; SpO<sub>2</sub>: oxygen saturation.

**Supplemental Table 2. WHO category at 6 hours and 24 hours after admission stratified by age and sex.** Cells are the absolute number of events at each time and the within-sex percentage of that status. Distribution of WHO status was significantly different by sex at both timepoints when all ages were considered together,  $p < 0.001$  by Fisher's exact at 6 hours and  $p < 0.001$  at 24 hours by Chi-square. Age stratified data is shown to illustrate the numbers and distribution of status across the cohort. Abbreviations. Mod: moderate.

|                  | WHO status at 6 hours |               |              |                |              |             | WHO status at 24 hours |              |              |                |              |              |
|------------------|-----------------------|---------------|--------------|----------------|--------------|-------------|------------------------|--------------|--------------|----------------|--------------|--------------|
|                  | Females, n (%)        |               |              | Males, n (%)   |              |             | Females, n (%)         |              |              | Males, n (%)   |              |              |
| Age group, years | Mild/Mod              | Severe        | Death        | Mild/Mod       | Severe       | Death       | Mild/Mod               | Severe       | Death        | Mild/Mod       | Severe       | Death        |
| 18-49            | 414<br>(96%)          | 17<br>(3.9%)  | 0<br>(0%)    | 370<br>(90%)   | 43<br>(10%)  | 0<br>(0%)   | 407<br>(94%)           | 23<br>(5.3%) | 1<br>(0.2%)  | 348<br>(84%)   | 64<br>(15%)  | 1<br>(0.2%)  |
| 50-64            | 267<br>(89%)          | 33<br>(11%)   | 0<br>(0%)    | 352<br>(84%)   | 67<br>(16%)  | 1<br>(0.2%) | 244<br>(81%)           | 54<br>(18%)  | 2<br>(0.7%)  | 316<br>(75%)   | 101<br>(24%) | 3<br>(0.7%)  |
| 65-74            | 177<br>(86%)          | 29<br>(14%)   | 1<br>(0.5%)  | 218<br>(81%)   | 51<br>(19%)  | 0<br>(0%)   | 159<br>(77%)           | 46<br>(22%)  | 2<br>(1.0%)  | 196<br>(73%)   | 65<br>(24%)  | 8<br>(3.0%)  |
| >75              | 301<br>(88%)          | 38<br>(11%)   | 3<br>(0.9%)  | 216<br>(89%)   | 26<br>(11%)  | 2<br>(0.8%) | 279<br>(82%)           | 50<br>(15%)  | 13<br>(3.8%) | 203<br>(83%)   | 34<br>(14%)  | 7<br>(2.9%)  |
| All ages         | 1,159<br>(91%)        | 117<br>(9.1%) | 44<br>(0.3%) | 1,156<br>(86%) | 187<br>(14%) | 3<br>(0.2%) | 1,089<br>(85%)         | 173<br>(14%) | 18<br>(1.4%) | 1,063<br>(79%) | 264<br>(20%) | 19<br>(1.4%) |

**Supplemental Table 3. Baseline comorbid conditions and health behaviors by sex.** Statistics by Chi-square except for Charlson score which was done by t-test. Abbreviations: BMI: Body mass index.

|                             | Females<br>N=1,269 | Males<br>N=1,339 | P value |
|-----------------------------|--------------------|------------------|---------|
| BMI category*               |                    |                  | <0.001  |
| <30                         | 505 (47%)          | 707 (63%)        |         |
| 30-35                       | 243 (23%)          | 235 (21%)        |         |
| 35-40                       | 156 (15%)          | 108 (9.6%)       |         |
| >40                         | 163 (15%)          | 79 (7.0%)        |         |
| Comorbid conditions         |                    |                  |         |
| Congestive heart failure    | 241 (19%)          | 276 (21%)        | 0.3     |
| Cardiovascular disease      | 489 (38%)          | 560 (42%)        | 0.08    |
| Hypertension                |                    |                  |         |
| Complicated                 | 291 (23%)          | 376 (28%)        | 0.003   |
| Uncomplicated               | 682 (53%)          | 725 (54%)        | 0.8     |
| Liver disease               | 143 (11%)          | 183 (14%)        | 0.07    |
| Asthma                      | 231 (18%)          | 114 (8.5%)       | <0.001  |
| Chronic pulmonary disease   | 389 (30%)          | 287 (21%)        | <0.001  |
| Chronic kidney disease      | 225 (18%)          | 311 (23%)        | <0.001  |
| Diabetes                    |                    |                  |         |
| Type I                      | 23 (1.8%)          | 24 (1.8%)        | >0.9    |
| Type II                     | 462 (36%)          | 509 (38%)        | 0.4     |
| Cancer                      | 140 (11%)          | 138 (10%)        | 0.7     |
| Transplant                  | 29 (2.3%)          | 40 (3.0%)        | 0.3     |
| HIV                         | 14 (1.1%)          | 25 (1.9%)        | 0.2     |
| Health behaviors            |                    |                  |         |
| Alcohol use <sup>#</sup>    | 209 (19%)          | 391 (34%)        | <0.001  |
| Smoking status <sup>%</sup> |                    |                  | <0.001  |
| Current Smoker              | 44 (3.8%)          | 112 (9.5%)       |         |
| Former Smoker               | 246 (21%)          | 295 (25%)        |         |
| Never Smoker                | 868 (75%)          | 773 (66%)        |         |

**Supplemental Table 4. Laboratory values.** Initial values (median of all values for each individual from -48 to +48 hours around the time of admission) and the peak (or nadir for ALC) values for the entire hospital course shown by sex for all individuals with values available. Number of samples for each measure (n) is indicated below the median value. Statistics with Wilcoxon rank sum tests, median and interquartile ranges for all values are shown.

|                                                         | Median initial values |                  | P value | Peak or nadir values |                  | P value |
|---------------------------------------------------------|-----------------------|------------------|---------|----------------------|------------------|---------|
|                                                         | Females<br>N=1,258    | Males<br>N=1,340 |         | Females<br>N=1,267   | Males<br>N=1,343 |         |
| Laboratory measure                                      | Median (IQR)          | Median (IQR)     |         | Median (IQR)         | Median (IQR)     |         |
| Absolute lymphocyte count, $\times 10^3$ cells/ $\mu$ L | 1.1 (0.82, 1.6)       | 1.0 (0.71, 1.4)  | <0.001  | 0.87 (0.53, 1.3)     | 0.74 (0.45, 1.1) | <0.001  |
|                                                         | n=1238                | n=1330           |         | n=1255               | n=1339           |         |
| CRP, mg/dL                                              | 6 (2, 11)             | 8 (4, 15)        | <0.001  | 8 (3, 16)            | 11 (6, 20)       | <0.001  |
|                                                         | n=1032                | n=1093           |         | N=1110               | n=1204           |         |
| ESR, mL/hour                                            | 48 (30, 71)           | 47 (28, 77)      | 0.8     | 59 (36, 93)          | 62 (32, 95)      | 0.9     |
|                                                         | n=282                 | n=297            |         | n=377                | n=424            |         |
| Neutrophil:lymphocyte ratio                             | 4.1 (2.5, 7.0)        | 4.9 (3.0, 8.4)   | <0.001  | 3.9 (2.5, 6.2)       | 4.7 (3.0, 7.3)   | <0.001  |
|                                                         | n=1,238               | n=1330           |         | n=1255               | n=1339           |         |
| D-dimer, mg/L FEU                                       | 0.91 (0.51, 2.0)      | 0.88 (0.50, 1.9) | 0.8     | 1 (1, 3)             | 1 (1, 4)         | 0.06    |
|                                                         | n=1042                | 1105             |         | n=1128               | 1209             |         |
| Ferritin, ng/mL                                         | 348 (156, 735)        | 767 (413, 1,362) | <0.001  | 463 (200, 945)       | 954 (510, 1,739) | <0.001  |
|                                                         | n=989                 | n=1046           |         | n=1083               | n=1169           |         |
| IL-6, pg/mL                                             | 33 (15, 74)           | 53 (22, 122)     | <0.001  | 39 (17, 99)          | 60 (23, 154)     | <0.001  |
|                                                         | n=468                 | n=504            |         | n=570                | n=641            |         |

**Supplemental Table 5. Laboratory values for individuals who had severe disease or death.** Initial values (median of all values for each individual from -48 to +48 hours around the time of admission) and the peak (or nadir for ALC) values for the entire hospital course shown by sex for individuals with severe disease with values available. Number of samples for each measure (n) is indicated below the median value. Statistics with Wilcoxon rank sum tests, median and interquartile ranges for all values are shown.

|                                                         | Median initial values<br>(Severe Only) |                     | P value | Peak or nadir values<br>(Severe Only) |                       | P value |
|---------------------------------------------------------|----------------------------------------|---------------------|---------|---------------------------------------|-----------------------|---------|
|                                                         | Females<br>N=358                       | Males<br>N=482      |         | Females<br>N=360                      | Males<br>N=483        |         |
| Laboratory measure                                      | Median (IQR)                           | Median (IQR)        |         | Median (IQR)                          | Median (IQR)          |         |
| Absolute lymphocyte count, $\times 10^3$ cells/ $\mu$ L | 0.91 (0.63, 1.34)                      | 0.86 (0.59, 1.17)   | 0.03    | 0.55 (0.33, 0.86)                     | 0.50 (0.28, 0.75)     | 0.004   |
|                                                         | n=354                                  | n=481               |         | n=360                                 | n=483                 |         |
| CRP, mg/dL                                              | 10 (5, 18)                             | 13 (8, 21)          | <0.001  | 16 (8, 24)                            | 19 (12, 27)           | <0.001  |
|                                                         | n=296                                  | n=406               |         | n=329                                 | n=449                 |         |
| ESR, mL/hour                                            | 52 (34, 91)                            | 66 (40, 93)         | 0.2     | 68 (42, 109)                          | 82 (50, 111)          | 0.2     |
|                                                         | n=94                                   | n=115               |         | n=144                                 | n=182                 |         |
| Neutrophil:lymphocyte ratio                             | 6 (4, 11)                              | 8 (5, 12)           | 0.02    | 5.9 (3.8, 10.2)                       | 6.4 (4.1, 9.9)        | 0.3     |
|                                                         | n=354                                  | n=481               |         | n=360                                 | n=483                 |         |
| D-dimer, mg/L FEU                                       | 1.3 (0.7, 3.0)                         | 1.3 (0.7, 2.9)      | >0.9    | 4 (2, 8)                              | 4 (2, 9)              | 0.4     |
|                                                         | n=287                                  | n=413               |         | n=325                                 | n=452                 |         |
| Ferritin, ng/mL                                         | 570<br>(282, 1,135)                    | 979<br>(556, 1,613) | <0.001  | 895<br>(434, 1,608)                   | 1,344<br>(768, 2,735) | <0.001  |
|                                                         | n=286                                  | n=397               |         | n=323                                 | n=450                 |         |
| IL-6, pg/mL                                             | 84 (36, 183)                           | 116 (57, 221)       | 0.04    | 118 (42, 271)                         | 134 (70, 420)         | 0.02    |
|                                                         | n=137                                  | n=215               |         | n=197                                 | n=291                 |         |
